# Supplementary material for: Atomic layer deposition of crystalline Bi2O3thin films and their conversion into Bi2S3by thermal vapor sulfurization
Source: Royal Society of Chemistry journal article supplement (doi:10.1039/c4ra09896j), 2014-10-22
Supplement: c4ra09896j1.pdf [file c4ra09896j1.pdf]

## Supporting Information

### Atomic layer deposition of crystalline $\text{Bi}_2\text{O}_3$ thin films and their conversion into $\text{Bi}_2\text{S}_3$ by thermal vapor sulfurization

H. F. Liu,<sup>1,a)</sup> K. K. Ansah Antwi,<sup>1</sup> Y. D. Wang,<sup>2</sup> L. T. Ong,<sup>1</sup> S. J. Chua,<sup>1</sup> and D. Z. Chi<sup>1</sup>

<sup>1</sup>*Institute of Materials Research and Engineering (IMRE), A\*STAR (Agency for Science, Technology and Research), 3 Research Link, Singapore 117602, Singapore*

<sup>2</sup>*School of Engineering, Nanyang Polytechnic, 180 Ang Mo Kio Avenue 8, Singapore 569830, Singapore*

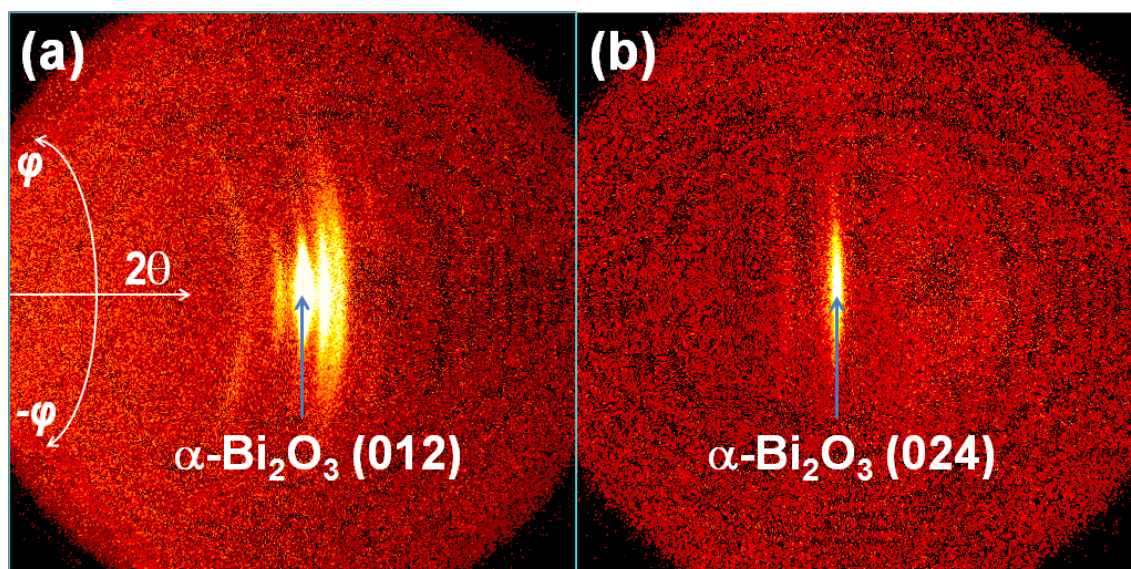

Figure S1: XRD area imaging of the diffraction intensity distributions in  $\phi$ - $2\theta$  frames (a) targeting the  $\alpha\text{-Bi}_2\text{O}_3$  (012) diffractions and (b) targeting at the  $\alpha\text{-Bi}_2\text{O}_3$  (024) diffractions.

<sup>a)</sup> Author to whom correspondence should be addressed; electronic mail: [liuhf@imre.a-star.edu.sg](mailto:liuhf@imre.a-star.edu.sg)

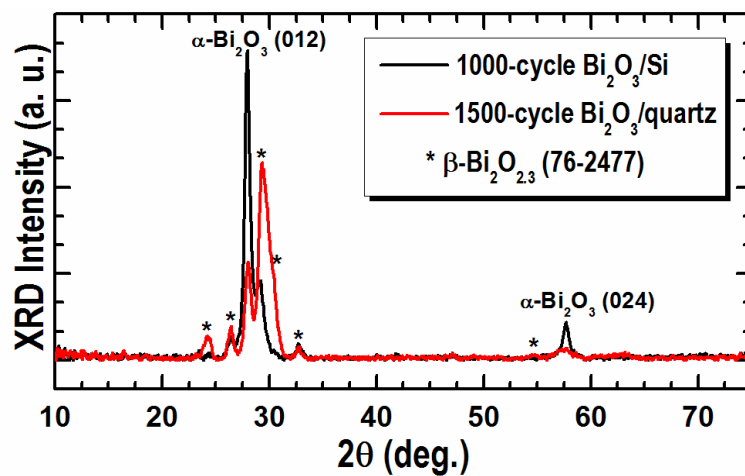

Figure S2: XRD patterns collected from the Bi<sub>2</sub>O<sub>3</sub> thin film samples grown by ALD on Si and quartz substrates.

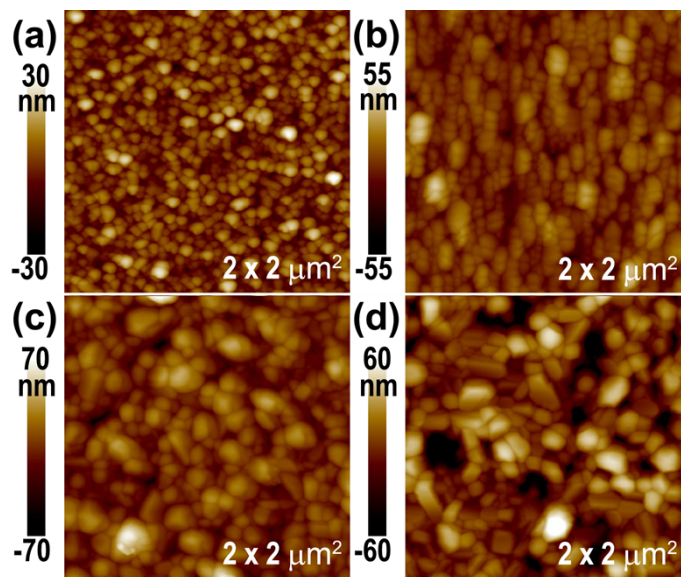

Figure S3: AFM images recorded from the sulfurized Bi<sub>2</sub>S<sub>3</sub> samples, i.e., the Bi<sub>2</sub>O<sub>3</sub> thin film samples after sulfurization, on quartz substrates: (a) 500 cycles sulfurized at 500 °C, (b) 1000 cycles sulfurized at 500 °C, (c) 1500 cycles sulfurized at 500 °C, and (d) 1500 cycles sulfurized at 600 °C.

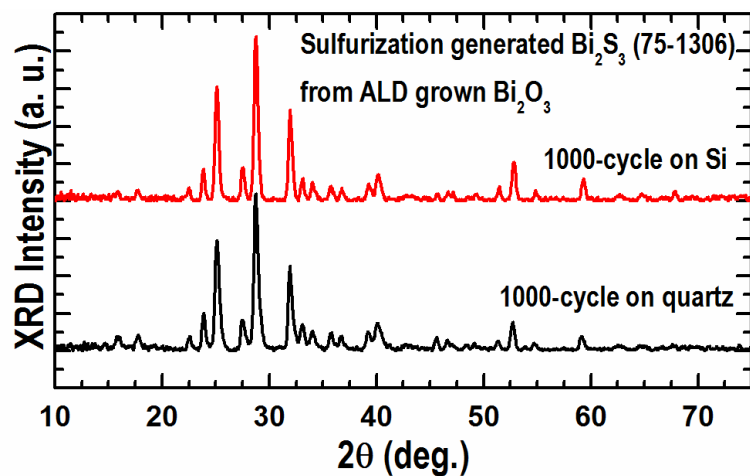

Figure S4: XRD patterns collected from the sulfurized (at 500 °C) Bi<sub>2</sub>S<sub>3</sub> thin films with the initial Bi<sub>2</sub>O<sub>3</sub> grown by ALD on Si and quartz substrates.

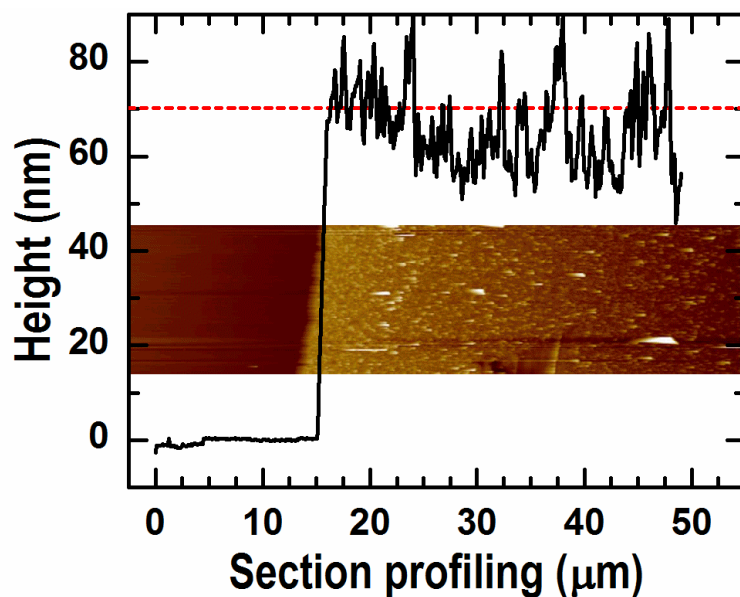

Figure S5: Thickness measurement of the sulfurized Bi<sub>2</sub>S<sub>3</sub> thin film by AFM from the edge of an intentionally starched area.

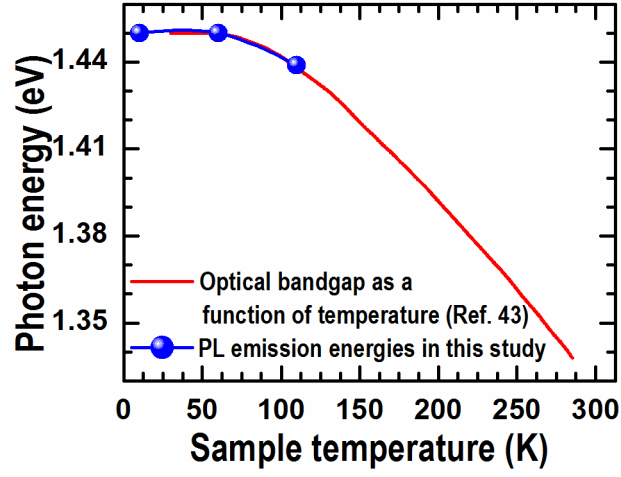

Figure S6: Comparisons of the measured PL emission energies in this study with those of optical bandgap energies reproduced with permission from Ref. 43.

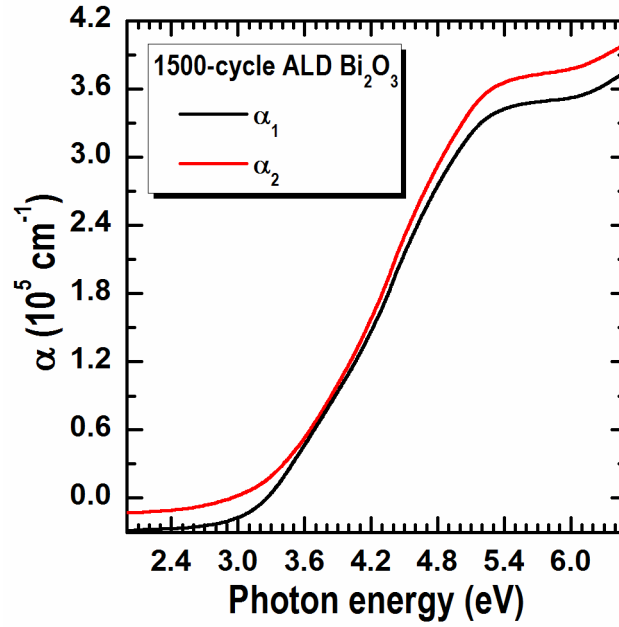

Figure S7: Absorption coefficient spectra of 1500-cycle ALD grown  $\text{Bi}_2\text{O}_3$  obtained

$$\text{via } \alpha_1 = \ln[(1-R)/T]/d \text{ and } \alpha_2 = \ln \left[ \frac{(1-R)^2 + \sqrt{(1-R)^4 + 4R^2T^2}}{2T} \right] / d$$

by measuring the reflectance  $R$  and transmittance  $T$ .
